# Supplementary material for: An investigation of Pluronic P123–sodium cholate mixed system: micellization, gelation and encapsulation behavior
Source: Royal Society of Chemistry journal article supplement (doi:10.1039/c5ra13002f), 2015-01-01
Supplement: c5ra13002f1.pdf [file c5ra13002f1.pdf]

## Supporting Information

### **An investigation of Pluronic P123-Sodium cholate mixed system: Micellization, Gelation and Encapsulation behavior**

*Uzma Ashraf, Oyais Ahmad Chat, Masrat Maswal, Suraya Jabeen, Aijaz Ahmad  
Dar\**

Department of Chemistry, University of Kashmir, Hazratbal, Srinagar-190 006, J&K, India

*\*Corresponding Author:*

*A.A. Dar, Fax: + 91- 1942414049; Tel: + 91- 9906417902, email: [aijaz\\_n5@yahoo.co.in](mailto:aijaz_n5@yahoo.co.in),  
[aijazdar@kashmiruniversity.ac.in](mailto:aijazdar@kashmiruniversity.ac.in)*

#### **DLS of 5 and 25wt % P123**

The DLS results revealed that the intensity distribution was not affected much by increase in P123 concentration from 5 wt% to 25 wt% (Figure S1). Therefore, we performed the DLS measurements using 25 wt% P123 at different mole fractions of Sodium Cholate.

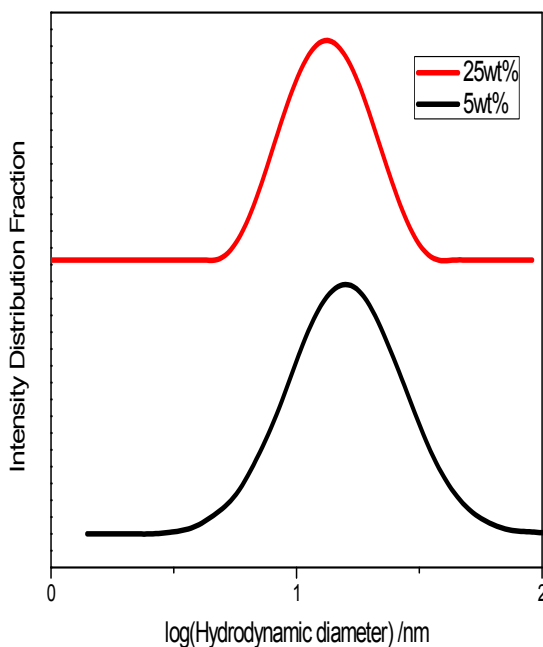

**FigureS1:** Intensity weighted Size distribution plots of 5 and 25wt% P123
